# Supplementary material for: Immunoglobulins in COVID-19 pneumonia: from the acute phase to the recovery phase
Source: PubMed Central journal article supplement (PMC10998353; doi:10.1186/s40001-024-01824-5), 2024-04-06

Figure S1

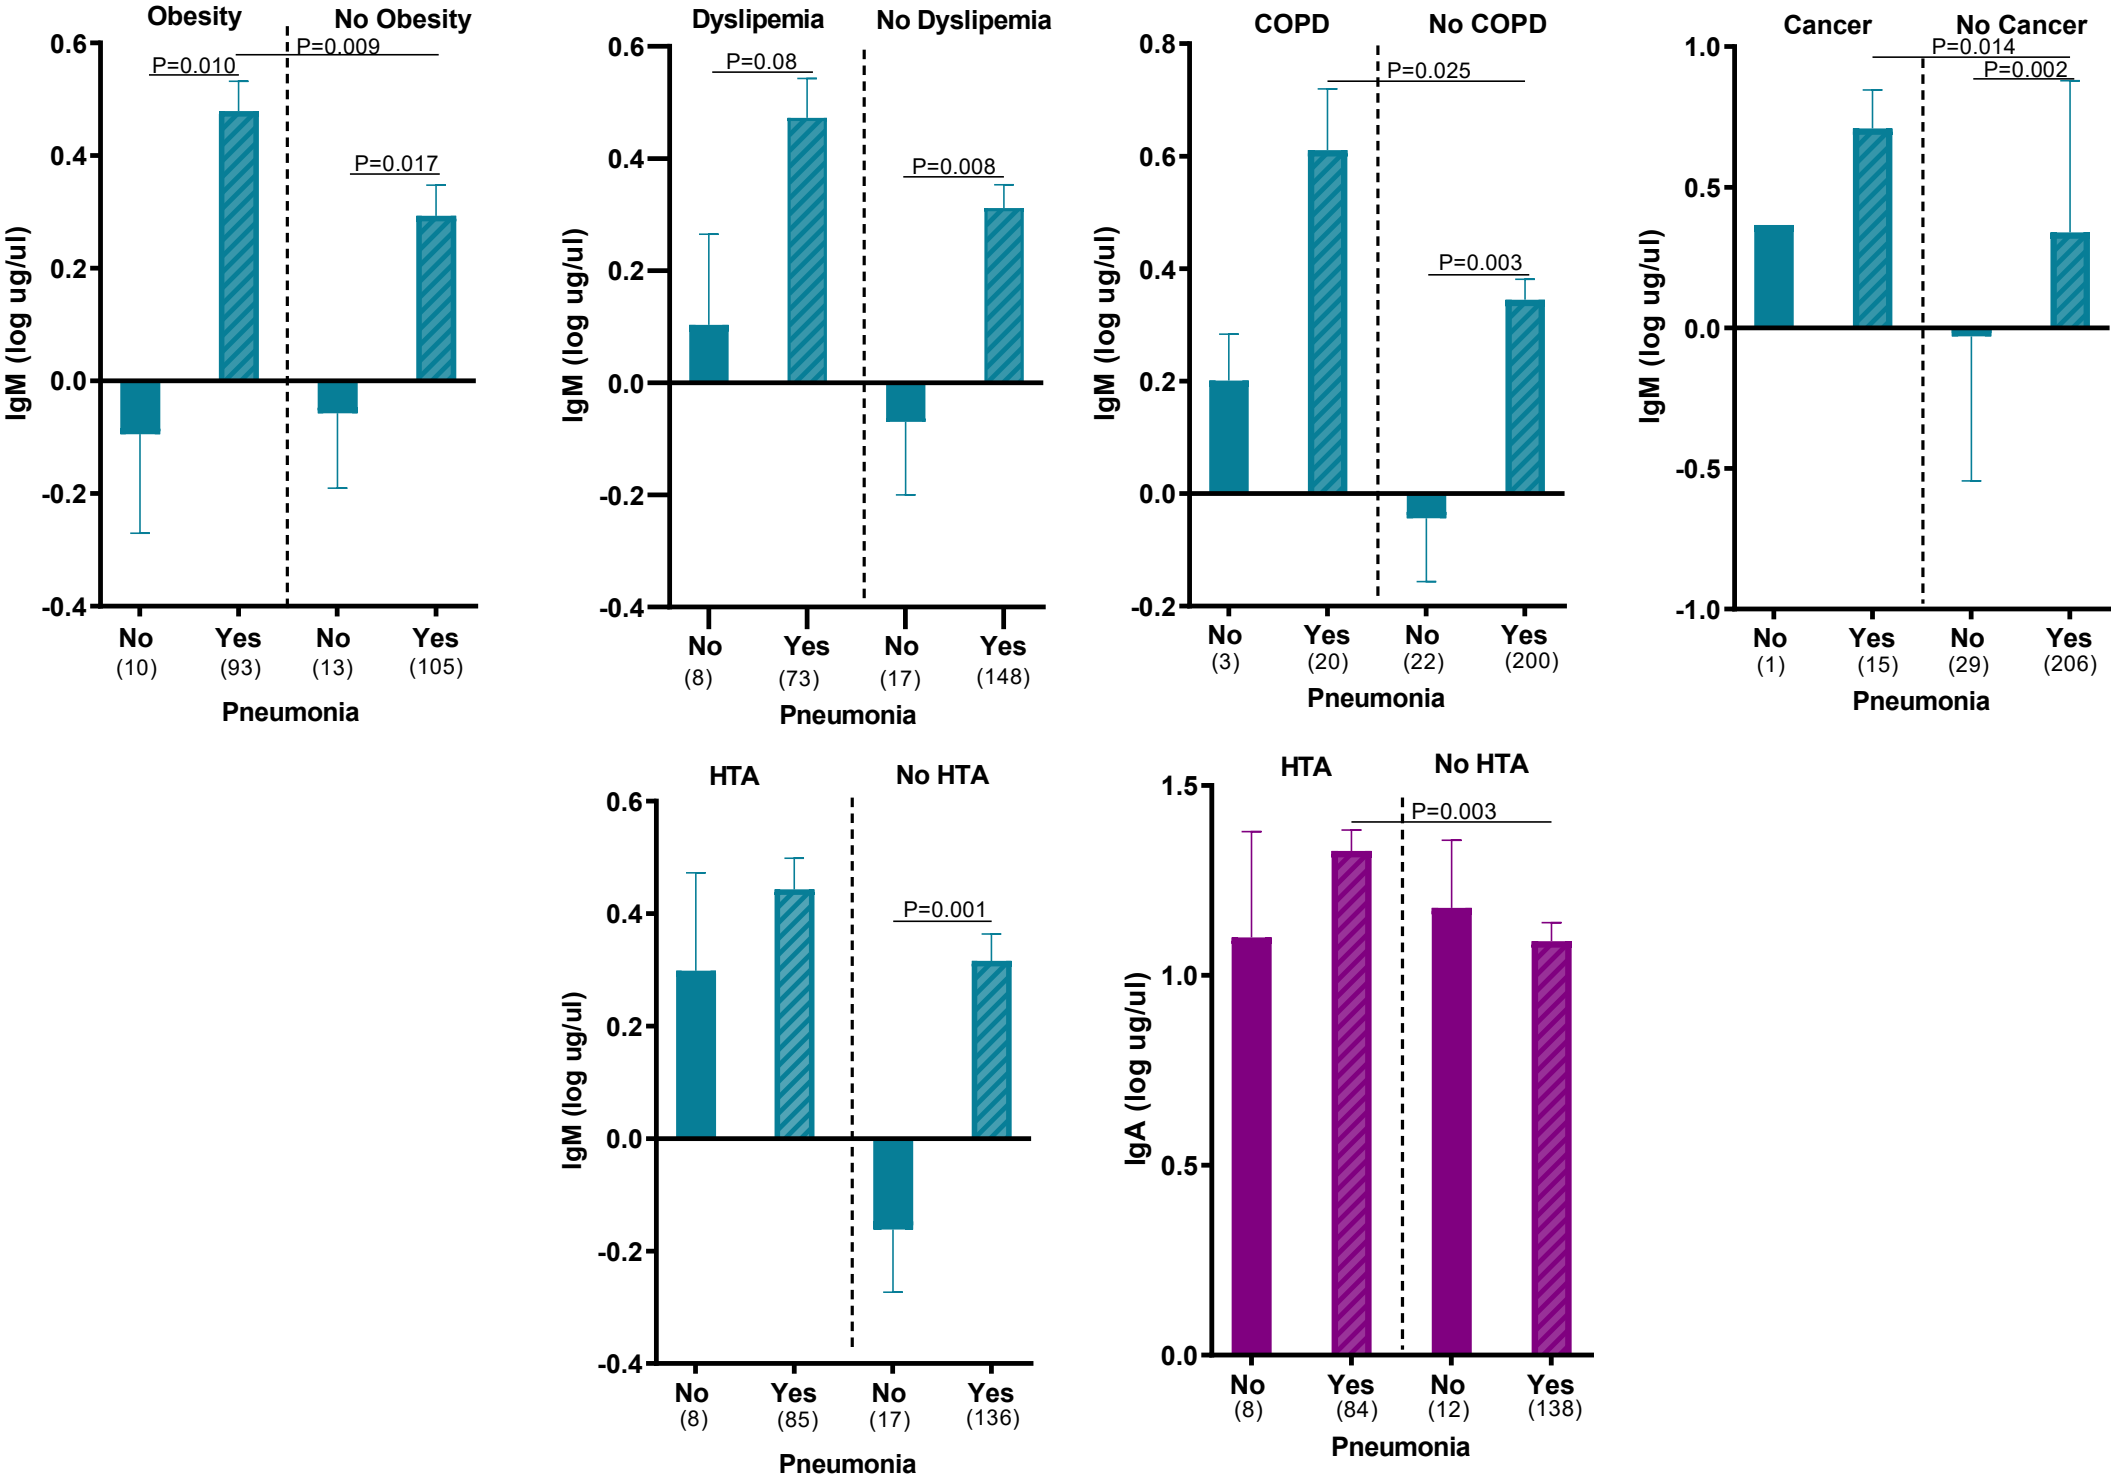

Figure S2

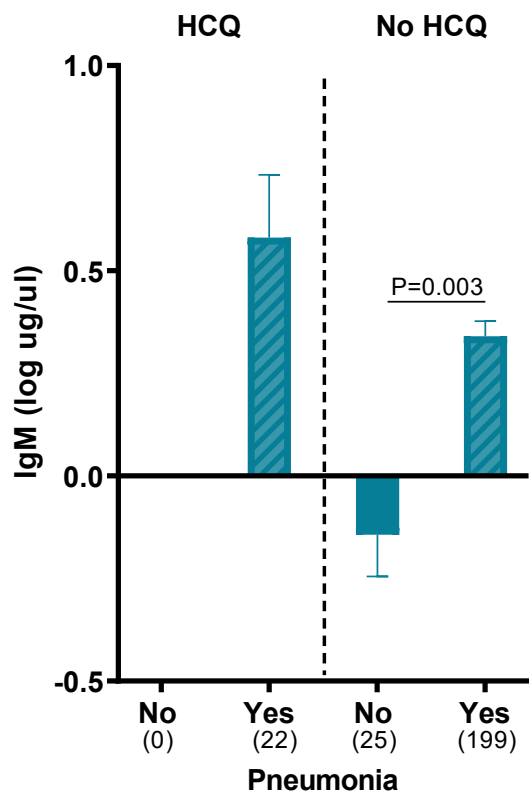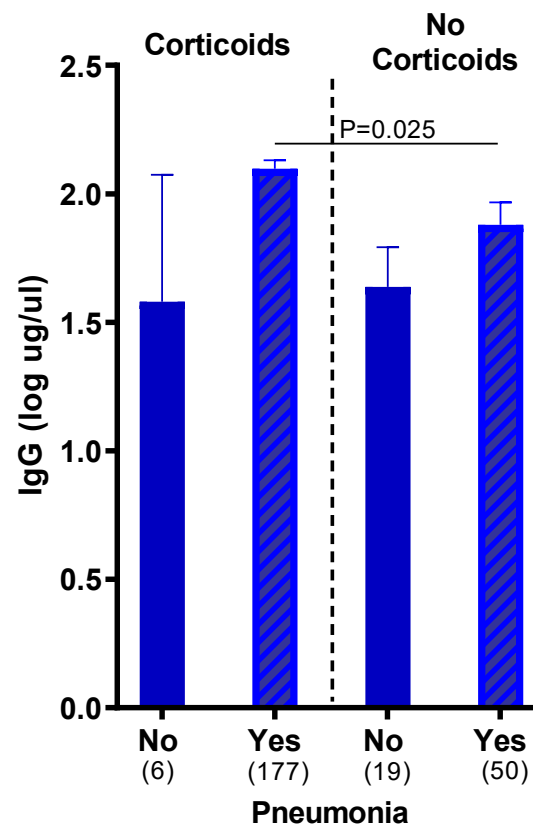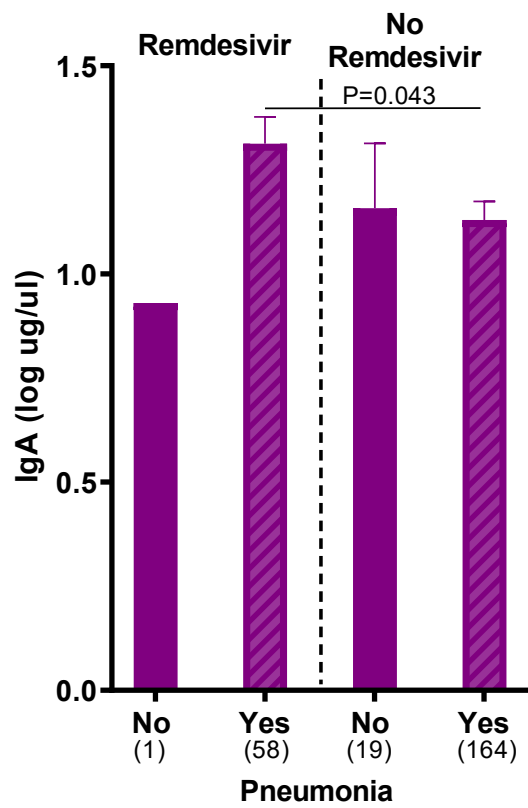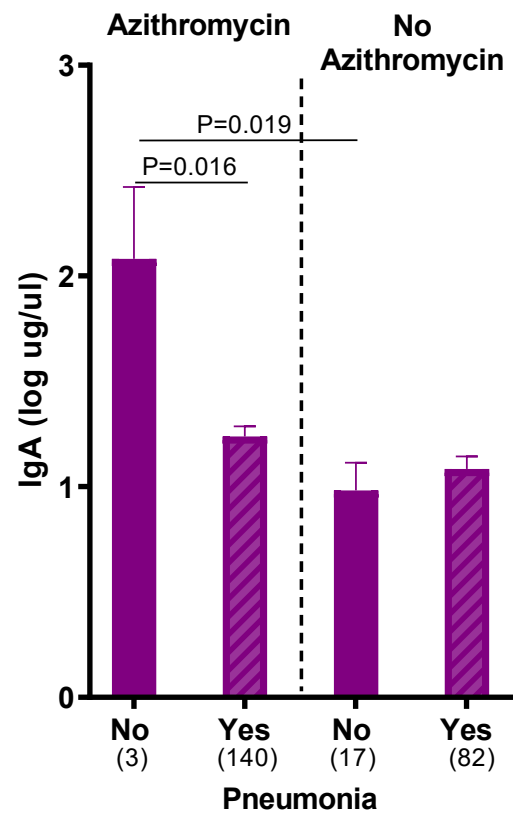

Supplement: 40001_2024_1824_MOESM1_ESM.pdf [file 40001_2024_1824_MOESM1_ESM.pdf]
